## The *MMP2* rs243865 polymorphism increases the risk of prostate cancer: A meta-analysis

Kun Liu<sup>1,\*</sup>, Shuo Gu<sup>1</sup>, Xuzhong Liu<sup>1</sup>, Qing Sun<sup>1</sup>, Yunyan Wang<sup>1</sup>, Junsong Meng<sup>1</sup> and Zongyuan Xu<sup>1</sup>

<sup>1</sup>Department of Urology, Huai'an First People's Hospital, Nanjing Medical University, Huai'an, China, 223300

\* Co first author

Correspondence to: Zongyuan Xu, email: w541003954@126.com  
Junsong Meng, email: w675921038@126.com

**Keywords:** prostate cancer, matrix metalloproteinase 2, polymorphism, meta-analysis

**Received:** May 04, 2017

**Accepted:** May 10, 2017

**Published:** May 19, 2017

Copyright: Liu et al. This is an open-access article distributed under the terms of the Creative Commons Attribution License 3.0 (CC BY 3.0), which permits unrestricted use, distribution, and reproduction in any medium, provided the original author and source are credited.

### ABSTRACT

Prostate cancer is a common cancer in men. However, the association between the rs243865 single-nucleotide polymorphisms in the matrix metalloproteinase 2 gene (*MMP2*) and the risk for prostate cancer is inconclusive. We searched the PubMed, EMBASE, Cochrane Library, and the Chinese CNKI and WANFANG databases for the relevant literature. Data were extracted and pooled results were estimated from odds ratios (OR) with 95% confidence intervals (95% CIs). The quality of included studies was assessed, and publication bias of all included studies was examined. A total five studies involving 1895 patients with prostate cancer and 1918 controls were included. There was a significant association between rs243865 polymorphisms and higher risk of prostate cancer in the co-dominant model, dominant model, and allele model (CC vs. CT+TT, OR: 1.60, 95% CI: 1.22–2.11,  $P = 0.001$ ; CC vs. CT, OR: 1.80, 95% CI: 1.34–2.42,  $P < 0.001$ ; C vs. T, OR: 1.32, 95% CI: 1.05–1.66,  $P = 0.016$ , respectively). However, there was no significant difference between the co-recessive model and recessive model. Our meta-analysis results suggest that *MMP2* rs243865 polymorphisms are significantly associated with higher risk of prostate cancer.

### INTRODUCTION

Prostate cancer is a major public health problem worldwide; it has a multifactorial and complex etiology. It is the second most common male malignancy in the world and the fourth most common cancer overall, accounting for 11% of male cancers and 9% of cancer-related mortality [1, 2]. While the incidence and mortality rates of prostate cancer vary across different regions, the highest rates have been reported in the developed countries [3]. With regard to the high morbidity and mortality rates, early diagnostic methods of prostate cancer remain important but are insufficient for identifying the disease even with the widespread use of serum prostate-specific antigen (PSA) examination in elderly men [4].

Matrix metalloproteinase 2 (*MMP2*), a member of the *MMP* gene family, encodes the zinc-dependent enzymes capable of cleaving components of the

extracellular matrix (ECM) and the molecules involved in signal transduction [5]. Numerous studies have indicated the crucial role of the *MMP2* gene in the pathogenesis of the initiation, invasion, and metastasis of various tumors, such as ovarian cancer, hepatocellular carcinoma, prostate cancer, and lung cancer [6–9]. It has been suggested that the *MMP2* gene is strongly associated with the development of prostate cancer by affecting cell growth, the production of cell junction proteins, such as collagens, and the pathogenesis of metastasis and invasion [10–12]. Furthermore, certain single-nucleotide polymorphism (SNP) mutations of the *MMP2* gene, especially at position -1306 of the *MMP2* promoter (rs243865), function as regulatory factors in the formation and metastasis of prostate cancer [13]. However, the results were conflicting when these studies were taken together.

In this study, we performed a literature review and conducted a meta-analysis of the pooled results of relevant

data from studies exploring the association between *MMP2* genetic polymorphisms and the risk of prostate cancer.

## RESULTS

### Study characteristics

Figure 1 shows the flow diagram for the literature search. Based on the search strategy, seven articles were identified in the initial search. After the full-text review, two studies were excluded based on the inclusion and exclusion criteria. Subsequently, a total five studies involving 1895 cases and 1918 controls were included in our meta-analysis [13–17].

Table 1 shows the main characteristics of the included studies. All studies were published in English. The publication year ranged 2008–2016. The ethnicities studied were Asian, Caucasian, and Latino. Only one *MMP2* SNP (rs243865) could be included for meta-analysis. Only one study [14] performed Hardy–Weinberg equilibrium (HWE) testing. The quality of primary studies

as assessed by the Newcastle-Ottawa Scale (NOS) showed that except the study by Srivastava et al. [14], which was high-quality, the studies were all medium-quality.

### Pooled results of meta-analysis

Table 2 summarizes the results on the association between *MMP2* -1306C/T SNPs and the risk of prostate cancer. Four studies were included in the co-dominant analysis, and there was a significant difference between two groups (CC vs. CT+TT, odds ratio [OR]: 1.60, 95% confidence interval [95% CI]: 1.22–2.11,  $P = 0.001$ ; Figure 2A). Similarly, there was a significant difference between patients with prostate cancer and the controls in the dominant and allele models (CC vs. CT, OR: 1.80, 95% CI: 1.34–2.42,  $P < 0.001$ ; Figure 2B; C vs. T, OR: 1.32, 95% CI: 1.05–1.66,  $P = 0.016$ ; Figure 2C, respectively). No statistical significance was found in the co-recessive and recessive models between two groups (TT vs. CC+CT, OR: 1.01, 95% CI: 0.86, 1.19,  $P = 0.87$ ; Figure 2D; CC vs. TT, OR: 1.02, 95% CI: 0.60, 1.74,  $P = 0.95$ , respectively; Figure 2E).

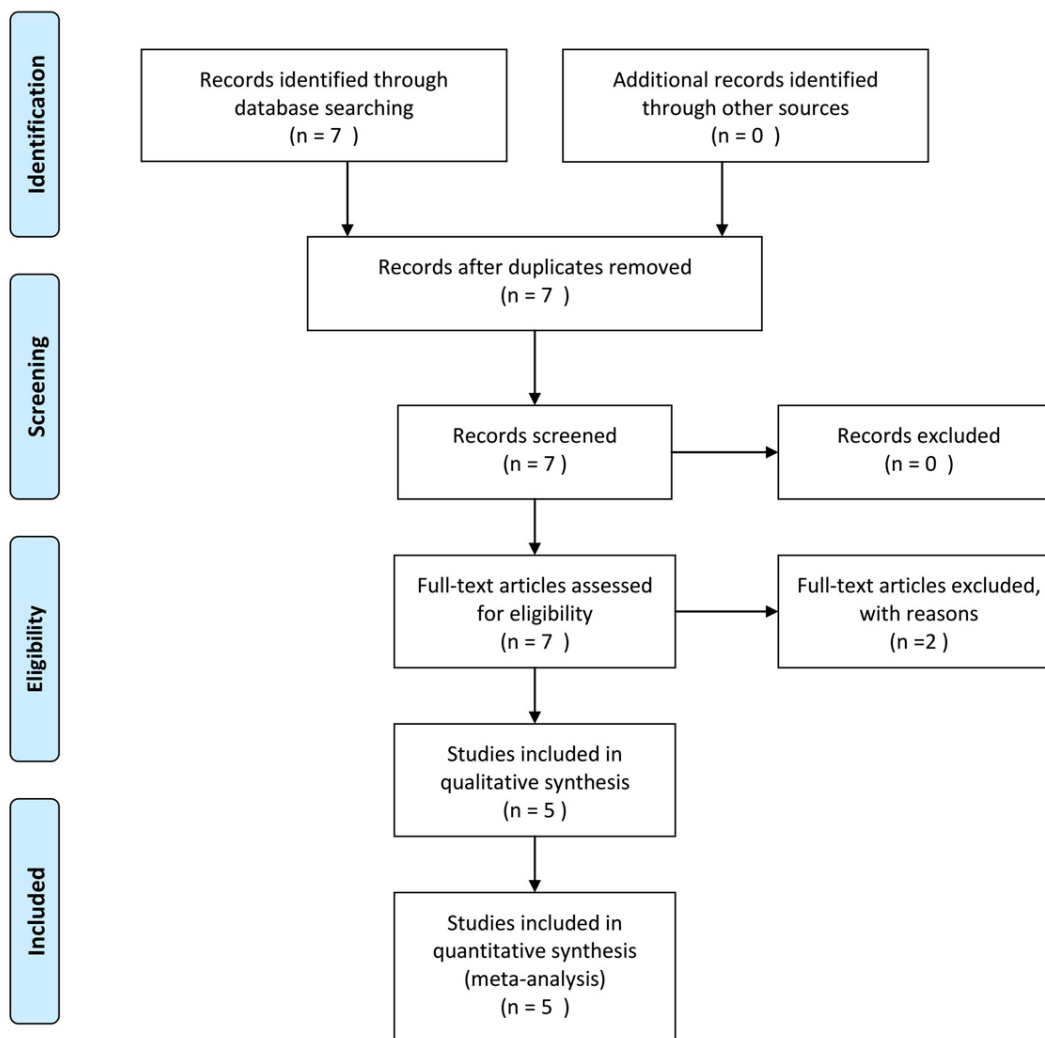

Figure 1: Flow diagram of study selection.

**Table 1: Main characteristics of eligible studies**

| Author               | Ethnicity | Case number (Con/PC group) | Mean age (years; mean $\pm$ SD)               | Genotyping methods | HWE test | NOS score |
|----------------------|-----------|----------------------------|-----------------------------------------------|--------------------|----------|-----------|
| L.S. Salavat (2016)  | Asian     | 54/50                      | Con: 60.17 $\pm$ 8.7;<br>PC: 65.46 $\pm$ 8.99 | PCR                | NA       | 6         |
| Z. Adabi (2015)      | Asian     | 139/102                    | NA                                            | PCR                | NA       | 6         |
| P. Srivastava (2012) | Asian     | 200/190                    | Con: 59.1 $\pm$ 10.4;<br>PC: 62.6 $\pm$ 8.9   | PCR-RFLP           | Yes      | 7         |
| ST. d Reis (2009)    | Latino    | 100/100                    | 65 $\pm$ 6.9                                  | Taqman             | NA       | 6         |
| E.J. Jacobs (2008)   | Caucasian | 1425/1453                  | NA                                            | MassARRAY system   | NA       | 5         |

Abbreviations: Con, control; PC, prostate cancer; SD, standard deviation; HWE, Hardy-Weinberg equilibrium; NOS, Newcastle-Ottawa Scale; PCR-RFLP, PCR- Restriction fragment length polymorphism; NA, not available.

**Table 2: Results of meta-analysis of MMP2 -1306C/T polymorphisms and PC risk**

| Model        | Polymorphisms | Eligible studies | OR   | 95% CIs    | P value           | I <sup>2</sup> | P value |
|--------------|---------------|------------------|------|------------|-------------------|----------------|---------|
| Co-dominant  | CC vs. CT+TT  | 4                | 1.60 | 1.22, 2.11 | <b>0.001</b>      | 0.0%           | 0.97    |
| Co-recessive | TT vs. CC+CT  | 5                | 1.01 | 0.86, 1.19 | 0.87              | 9.7%           | 0.35    |
| Recessive    | CC vs. TT     | 4                | 1.02 | 0.60, 1.74 | 0.95              | 3.5%           | 0.38    |
| Dominant     | CC vs. CT     | 4                | 1.80 | 1.34, 2.42 | <b>&lt; 0.001</b> | 0.0%           | 0.89    |
| Allele       | C vs. T       | 4                | 1.32 | 1.05, 1.66 | <b>0.016</b>      | 0.0%           | 0.45    |

Abbreviations: MMP2, matrix metalloproteinase 2; PC, prostate cancer; OR, odds ratio; 95% CIs, 95% confidential intervals.

There was no heterogeneity in any genetic model (Table 2). One-way sensitivity analysis was performed to determine the degree to which an individual study affected the overall OR estimates, and showed that excluding individual studies did not affect the pooled ORs and 95% CIs. Furthermore, sensitivity analysis revealed no significant publication bias in any genetic model ( $P > 0.05$ ).

## DISCUSSION

Prostate cancer is one of the most common cancers in men. MMP2 is involved in tumor pathogenesis, which plays a key role in tumor cell invasion and metastasis. Thus, genetic variants that influence the level of MMP2 gene expression or protein function could contribute to tumor invasion and metastasis [18]. In our meta-analysis, it is indicated for the first time that the MMP2 rs243865 SNP is significantly correlated with the risk of prostate cancer.

MMPs are zinc metalloproteases that degrade ECM collagens, which are important in tissue remodeling and repair during development and inflammation [19]. Among the MMP genes, gelatinase A, encoded by the MMP2 gene, has been specifically correlated to tumor pathogenesis [20, 21]. Furthermore, the MMP2 promoter contains several cis-acting regulatory elements, which modulate MMP2 expression through transcription factors, such as p53 and Sp1 [22, 23]. Among these MMP2 promoter SNPs, C/T transition at nucleotide -1306 disrupts the Sp1-binding

position at the T allele (CCACC BOX) and has significantly lower transcription activity when compared to the C allele [24]. In the present study, the co-dominant model, dominant model, and allele model results suggest that subjects carrying the T allele have higher prostate cancer risk compared to those with the C allele, which could be because T alternation in rs243865 could decrease promoter activity in two different luciferase reporter gene constructs: one in the context of the Sp1 regulatory element and the other in the background of the native MMP2 promoter [25]. Sp1 is a ubiquitously expressed transcription factor that regulates a variety of genes in a constitutive or inducible manner and exerts a synergistic effect essential for modulating gene activation [26, 27]. Recently, a meta-analysis that investigated the association of the MMP2 -1306C/T polymorphism with cancer risk reported that the SNP was significantly correlated with reduced risk of cancer, which is consistent with our results [25]. Taken together, the MMP2 -1306C/T SNP is significantly associated with reduced risk of prostate cancer, and could be a candidate SNP for prostate cancer diagnosis.

Nevertheless, our findings should be interpreted with caution, given the limitations of this study. First, only studies published in English and Chinese were included. Next, limited by the number of eligible studies, we could not perform subgroup analysis of prostate cancer based on the Gleason score or tumor-node-metastasis (TNM) classification. Therefore, the statistical power might be insufficient for assessing the relationship in prostate cancer.

In summary, we show that the *MMP2* -1306C/T polymorphism is a susceptibility locus for prostate cancer. Individuals carrying the T allele are significantly associated with increased prostate cancer risk. Large-scale, well-designed studies should be conducted to confirm our results and explore the mechanisms further.

## MATERIALS AND METHODS

### Search strategy

A comprehensive literature search was performed using the PubMed, Cochrane Library Central Register of Controlled Trials (CENTRAL), EMBASE, and the Chinese CNKI and WANFANG databases (updated April 1, 2017) by two authors (K L and XZ L) independently. The following keywords were used: (matrix metalloproteinase OR *MMP2*), AND (polymorphisms OR SNPs OR variants), AND (MESH item, prostatic neoplasms). The equivalent Chinese terms were used in the Chinese databases. Furthermore, the reference lists of all studies included in the meta-analysis were reviewed for possible inclusion.

### Inclusion and exclusion criteria

The inclusion criteria were: (1) case-control studies designed to investigate the relationship between *MMP2* SNPs and prostate cancer risk; (2) available information on the genotype or allele frequencies in case and control groups; (3) all subjects from three allelic groups were from a population within the same geographic area and ethnic background; (4) full-text article published in English or Chinese. Studies with insufficient data for pooling and

with no genotype frequencies for each polymorphism and outcome were excluded. Reviews or studies based on non-human research were also excluded. Two authors (K L and XZ L) independently assessed and selected studies for final analysis; discrepancies were resolved by consensus.

### Data extraction and quality assessment

Two investigators (K L and XZ L) independently reviewed and extracted the relevant data from all included studies and reached consensus for all items. The following data were extracted from each included study: (1) first author's name and year of publication, (2) ethnicity, (3) number of controls and cases, (4) sex and mean age of controls and cases, (5) genotyping method and HWE of the controls, (6) allele or genotype frequencies of cases and controls. Missing data were examined by contacting the first or corresponding author. The quality of each included study was assessed according to a methodological quality assessment scale that had been extracted and modified from previous studies [28]. A total score of  $\leq 3$ , 4–6, and  $\geq 7$  indicated low, medium, and high quality, respectively.

### Statistical analysis

The pooled data were used to assess the strength of the association between *MMP2* polymorphisms and prostate cancer risk using OR with 95% CIs in dominant, recessive, co-dominant, co-recessive, and allele models.  $P < 0.05$  was considered statistically significant. Heterogeneity among studies was determined by  $I^2$  and was defined as  $100\% \times (Q - df)/Q$ , where Q is Cochran's heterogeneity statistic and df is the degrees of freedom,

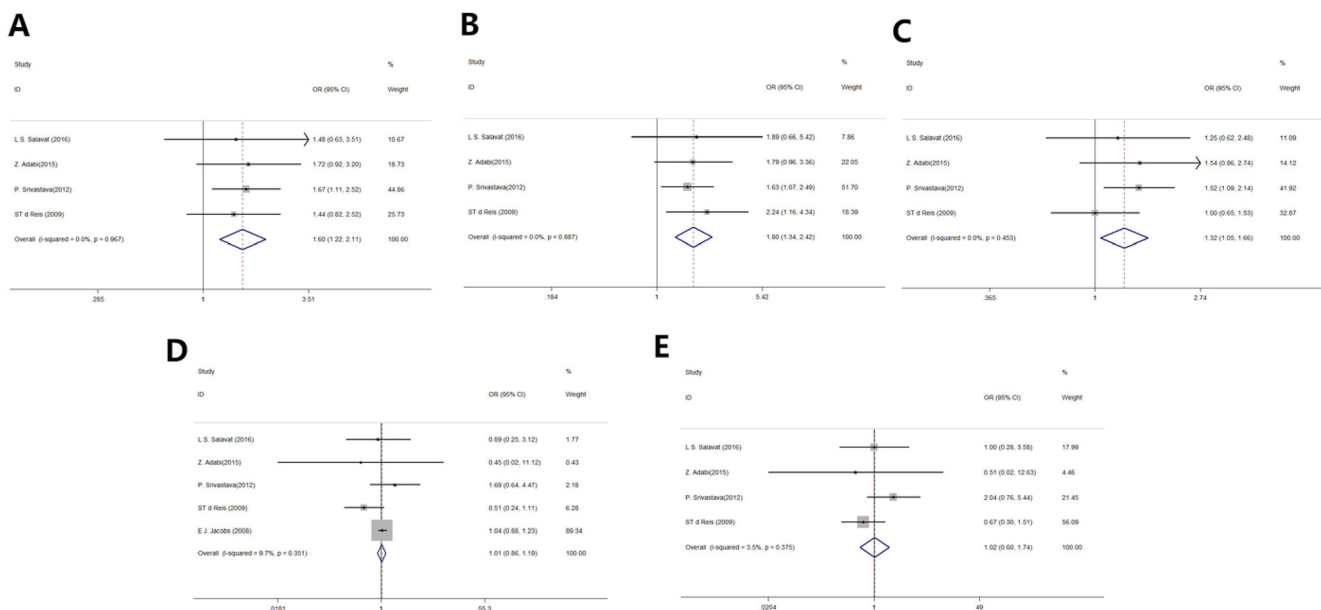

**Figure 2: Forest plot of *MMP2* rs243865 polymorphisms and prostate cancer risk. (A) Co-dominant model. (B) Dominant model. (C) Allele model. (D) Co-recessive model. (E) Recessive model.**



with a fixed-effect model selected at low statistical inconsistency ( $I^2 < 25\%$ ). Otherwise, a random-effect model, which is better adapted to clinical and statistical variations, was selected [29]. To explore the potential effects of heterogeneity, stratification analysis by ethnicity, age, and quality criteria was carried out. Egger's regression test and funnel plots were used to assess potential publication bias. Cumulative meta-analysis was carried out based on the year of publication. All analyses were performed using STATA (release 12.0, College Station, TX, USA).

## ACKNOWLEDGMENTS AND FUNDING

None.

## CONFLICTS OF INTEREST

The authors have no conflicts of interest to declare.

## REFERENCES

1. Ferlay J, Soerjomataram I, Dikshit R, Eser S, Mathers C, Rebelo M, Parkin DM, Forman D, Bray F. Cancer incidence and mortality worldwide: sources, methods and major patterns in GLOBOCAN 2012. *Int J Cancer*. 2015; 136:E359–86.
2. Öztürk H, Karapolat I. (18)F-fluorodeoxyglucose PET/CT for detection of disease in patients with prostate-specific antigen relapse following radical treatment of a local-stage prostate cancer. *Oncol Lett*. 2016; 11:316–22.
3. Siegel RL, Miller KD, Jemal A. Cancer statistics, 2016. *CA Cancer J Clin*. 2016; 66:7–30.
4. Jeong CW, Hong SK, Byun SS, Jeon SS, Seo SI, Lee HM, Ahn H, Kwon DD, Ha HK, Kwon TG, Chung JS, Kwak C, Kim HJ. Selection Criteria for Active Surveillance of Patients with Prostate Cancer in Korea: A Multicenter Analysis of Pathology after Radical Prostatectomy. *Cancer Res Treat*. 2017. <https://doi.org/10.4143/crt.2016.477>.
5. Ye H, He Y, Wang J, Song T, Lan Z, Zhao Y, Xi M. Effect of matrix metalloproteinase promoter polymorphisms on endometriosis and adenomyosis risk: evidence from a meta-analysis. *J Genet*. 2016; 95:611–19.
6. Xu W, Xu H, Fang M, Wu X, Xu Y. MKL1 links epigenetic activation of MMP2 to ovarian cancer cell migration and invasion. *Biochem Biophys Res Commun*. 2017; 487:500–08.
7. Zhang L, Li N, Yan HC, Jiang H, Fang XJ. Expression of Novel CD44st and MMP2 in NSCLC Tissues and Their Clinical Significance. *Oncol Res Treat*. 2017; 40:192–96.
8. Ghosh A, Dasgupta D, Ghosh A, Roychoudhury S, Kumar D, Gorain M, Butti R, Datta S, Agarwal S, Gupta S, Krishna Dhali G, Chowdhury A, Schmittgen TD, et al. MiRNA199a-3p suppresses tumor growth, migration, invasion and angiogenesis in hepatocellular carcinoma by targeting VEGFA, VEGFR1, VEGFR2, HGF and MMP2. *Cell Death Dis*. 2017; 8:e2706.
9. Ding X, Yang DR, Xia L, Chen B, Yu S, Niu Y, Wang M, Li G, Chang C. Targeting TR4 nuclear receptor suppresses prostate cancer invasion via reduction of infiltrating macrophages with alteration of the TIMP-1/MMP2/MMP9 signals. *Mol Cancer*. 2015; 14:16.
10. Moroz A, Delella FK, Almeida R, Lacorte LM, Fávoro WJ, Deffune E, Felisbino SL. Finasteride inhibits human prostate cancer cell invasion through MMP2 and MMP9 downregulation. *PLoS One*. 2013; 8:e84757.
11. Chen Q, Zhao X, Zhang H, Yuan H, Zhu M, Sun Q, Lai X, Wang Y, Huang J, Yan J, Yu J. MiR-130b suppresses prostate cancer metastasis through down-regulation of MMP2. *Mol Carcinog*. 2015; 54:1292–300.
12. Lu S, Zhu Q, Zhang Y, Song W, Wilson MJ, Liu P. Dual-Functions of miR-373 and miR-520c by Differently Regulating the Activities of MMP2 and MMP9. *J Cell Physiol*. 2015; 230:1862–70.
13. Meyer TE, Chu LW, Li Q, Yu K, Rosenberg PS, Menashe I, Chokkalingam AP, Quraishi SM, Huang WY, Weiss JM, Kaaks R, Hayes RB, Chanock SJ, Hsing AW. The association between inflammation-related genes and serum androgen levels in men: the prostate, lung, colorectal, and ovarian study. *Prostate*. 2012; 72:65–71.
14. Srivastava P, Lone TA, Kapoor R, Mittal RD. Association of promoter polymorphisms in MMP2 and TIMP2 with prostate cancer susceptibility in North India. *Arch Med Res*. 2012; 43:117–24.
15. Adabi Z, Mohsen Ziaei SA, Imani M, Samzadeh M, Narouie B, Jamaladini SH, Afshari M, Safavi M, Roshandel MR, Hasanzad M. Genetic Polymorphism of MMP2 Gene and Susceptibility to Prostate Cancer. *Arch Med Res*. 2015; 46:546–50.
16. Dos Reis ST, Pontes J Jr, Villanova FE, Borra PM, Antunes AA, Dall'oglio MF, Srougi M, Leite KR. Genetic polymorphisms of matrix metalloproteinases: susceptibility and prognostic implications for prostate cancer. *J Urol*. 2009; 181:2320–25.
17. Jacobs EJ, Hsing AW, Bain EB, Stevens VL, Wang Y, Chen J, Chanock SJ, Zheng SL, Xu J, Thun MJ, Calle EE, Rodriguez C. Polymorphisms in angiogenesis-related genes and prostate cancer. *Cancer Epidemiol Biomarkers Prev*. 2008; 17:972–77.
18. Curran S, Murray GI. Matrix metalloproteinases in tumour invasion and metastasis. *J Pathol*. 1999; 189:300–08.
19. Cui Y, Zhu JJ, Ma CB, Cui K, Wang F, Ni SH, Zhang ZY. Genetic polymorphisms in MMP 2, 3 and 9 genes and the susceptibility of osteosarcoma in a Chinese Han population. *Biomarkers*. 2016; 21:160–63.
20. Liang R, Yan XX, Lin Y, Li Q, Yuan CL, Liu ZH, Li YQ. Functional polymorphisms of the cyclooxygenase-2 gene and prognosis of hepatocellular carcinoma - a cohort study in Chinese people. *Genet Mol Res*. 2016; 15:15.

21. Tao L, Li Z, Lin L, Lei Y, Hongyuan Y, Hongwei J, Yang L, Chuize K. MMP1, 2, 3, 7, and 9 gene polymorphisms and urinary cancer risk: a meta-analysis. *Genet Test Mol Biomarkers*. 2015; 19:548–55.
22. Bian J, Sun Y. Transcriptional activation by p53 of the human type IV collagenase (gelatinase A or matrix metalloproteinase 2) promoter. *Mol Cell Biol*. 1997; 17:6330–38.
23. Qin H, Sun Y, Benveniste EN. The transcription factors Sp1, Sp3, and AP-2 are required for constitutive matrix metalloproteinase-2 gene expression in astrogloma cells. *J Biol Chem*. 1999; 274:29130–37.
24. Price SJ, Greaves DR, Watkins H. Identification of novel, functional genetic variants in the human matrix metalloproteinase-2 gene: role of Sp1 in allele-specific transcriptional regulation. *J Biol Chem*. 2001; 276:7549–58.
25. Haque S, Akhter N, Lohani M, Ali A, Mandal RK. Matrix metalloproteinase-2 -1306 C>T gene polymorphism is associated with reduced risk of cancer: a meta-analysis. *Asian Pac J Cancer Prev*. 2015; 16:889–96.
26. Turner J, Crossley M. Mammalian Krüppel-like transcription factors: more than just a pretty finger. *Trends Biochem Sci*. 1999; 24:236–40.
27. Qi F, Liu X, Wu H, Yu X, Wei C, Huang X, Ji G, Nie F, Wang K. Long noncoding AGAP2-AS1 is activated by SP1 and promotes cell proliferation and invasion in gastric cancer. *J Hematol Oncol*. 2017; 10:48.
28. Kun Liu SG, Liu X, Sun Q, Wang Y, Meng J, Xu Z. Meta-analysis reveals a lack of association between MRP2 C-24T genetic polymorphism and the pharmacokinetics of mycophenolic acid in adult renal transplant recipients. *Meta Gene*. 2017; 11:91–97.
29. Biondi-Zoccai G, Lotrionte M, Landoni G, Modena MG. The rough guide to systematic reviews and meta-analyses. *HSR Proc Intensive Care Cardiovasc Anesth*. 2011; 3:161–73.
